# Supplementary material for: Modeling of Effective Antimicrobials to Reduce Staphylococcus aureus Virulence Gene Expression Using a Two-Compartment Hollow Fiber Infection Model
Source: MDPI journal article supplement (doi:10.3390/toxins12020069), 2020-01-22
Supplement: s1 [file s1]

# Supplementary Materials: Modelling of Effective Antimicrobials to Reduce *Staphylococcus aureus* Virulence Gene Expression Using a Two Compartment Hollow Fiber Infection Model

Sanjay K. Shukla, Tonia Carter, Zhan Ye, Madhulatha Pantrangi and Warren E. Rose

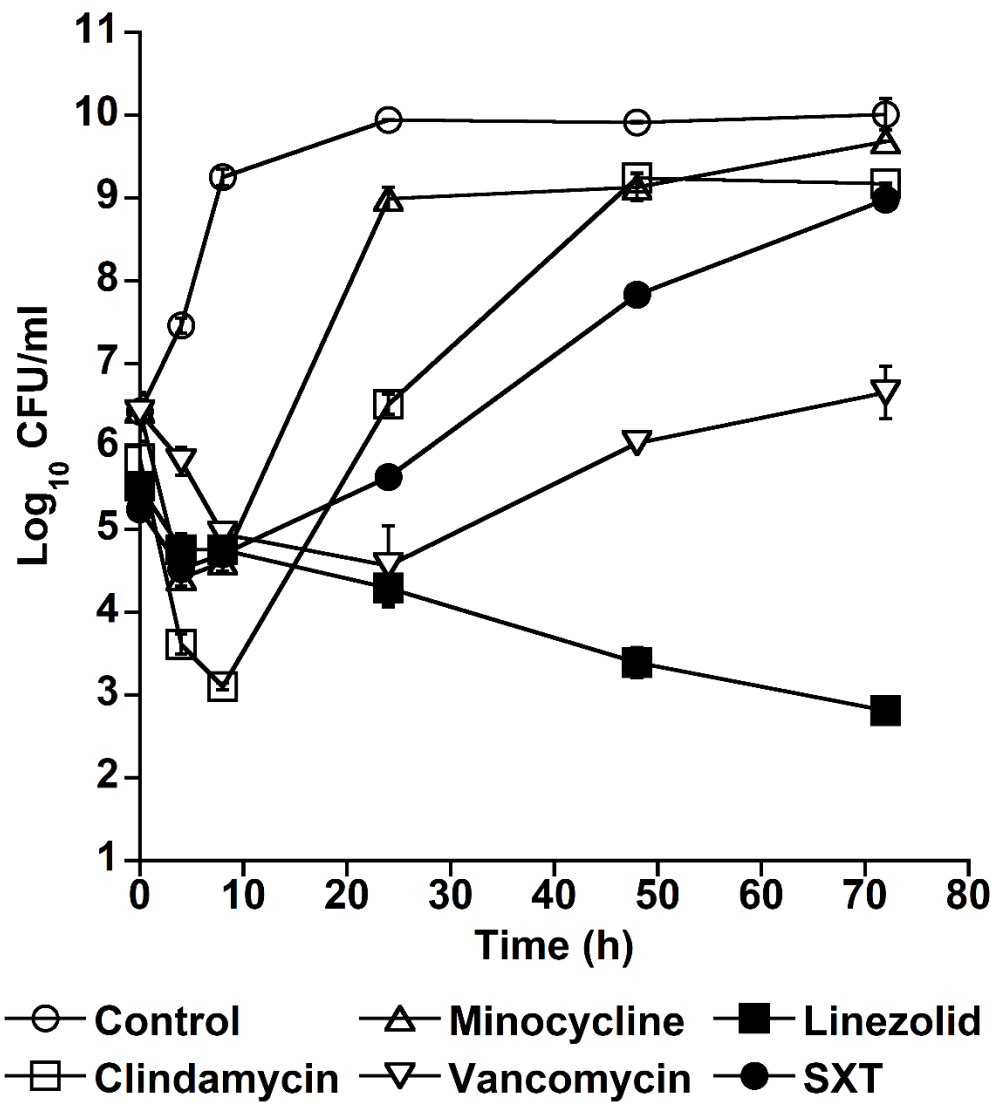

**Figure S1.** Growth curve of the USA300 strain in the hollow fiber model in the presence of five antimicrobial agents.

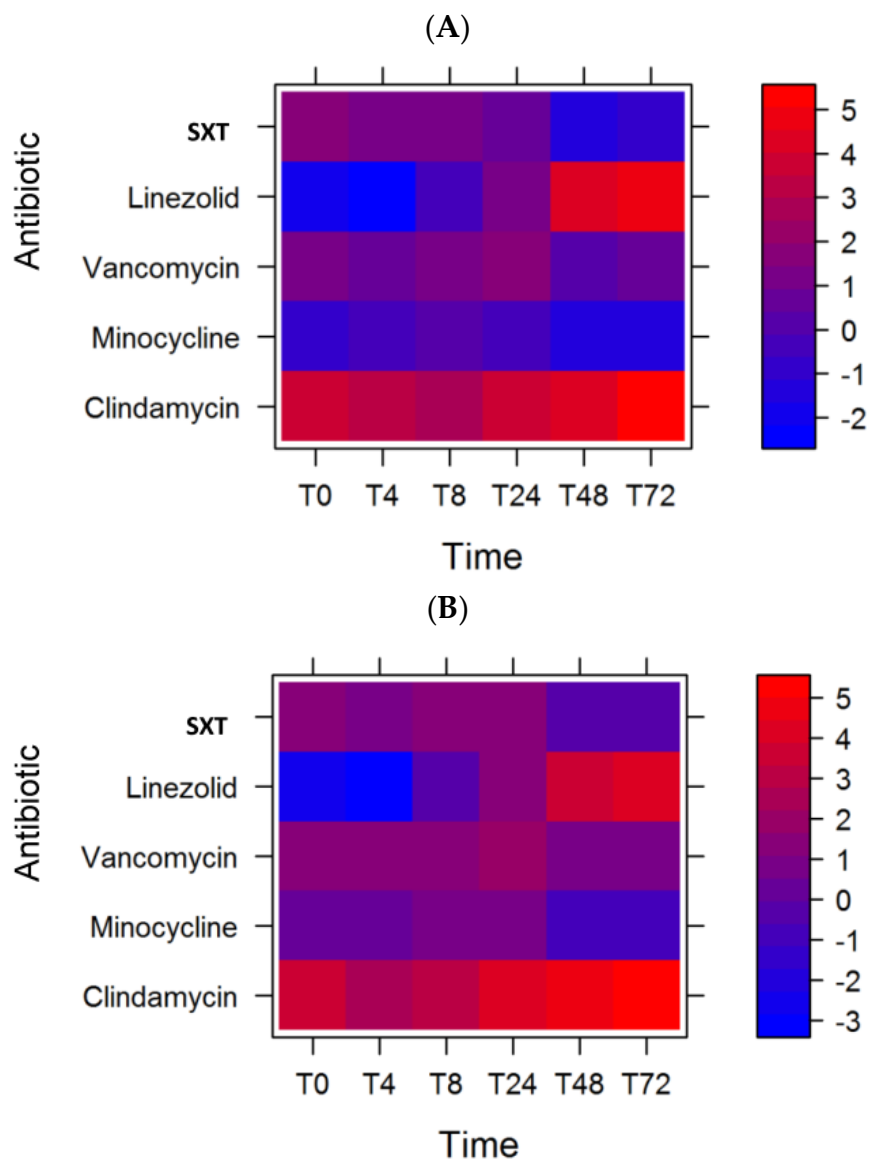

**Figure S2.** Heat plot showing the optimal course of antibiotics with MW2 gene expression data with *sel* and *sek* given the highest weight (A) and with all genes given equal weight (B).
